# Supplementary material
Source: PubMed Central journal article supplement (PMC4048786)
Supplement: NIHMS588024-supplement-1.pdf [file NIHMS588024-supplement-1.pdf]

**Fig. S1**

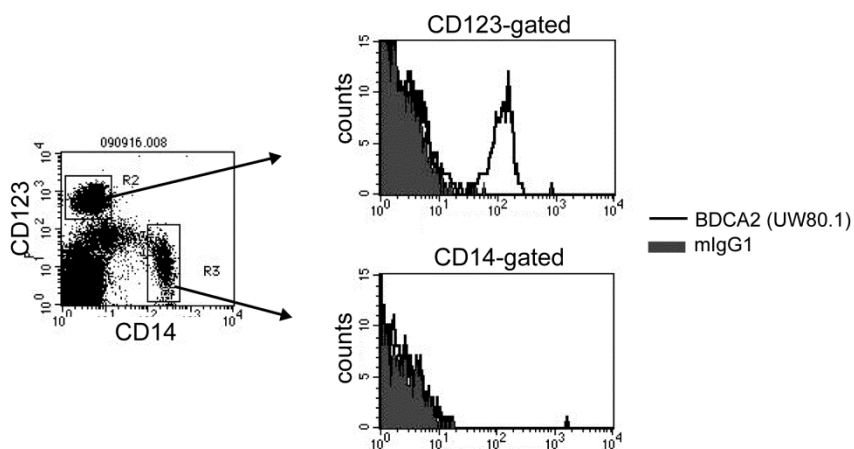

**Supplementary Figure 1. mAb UW80.1 binds specifically to human pDCs.** Peripheral blood obtained from healthy donors was stained with anti-CD14-PE, anti-CD123-FITC, Fc block, and either anti-BDCA2-biotin or mIgG1-biotin isotype control, followed by streptavidin-PerCP. Histograms depict binding of UW80.1 (open) or mIgG1 isotype control (filled) to CD14<sup>+</sup> monocytes and CD123<sup>+</sup> pDCs gated as shown. Results are representative of 2 individual donors.



**Supplementary Figure 2. Phenotype of pDCs after OVA-BDCA2 immunization.** Cohorts of B6.BDCA2 mice recipients of OT-II cells were injected i.v. with 1  $\mu$ g OVA-isotype or OVA-BDCA2 with or without 50  $\mu$ g R848 and sacrificed 24 hours following injection. Splenic pDC were analyzed for the expression of indicated surface markers by flow cytometry (A). Schematic for immunization and subsequent analysis. B, Flow plots show the frequency of pDCs of gated live CD19<sup>-</sup> cells. C. Histograms show levels of expression of indicated surface marker in OVA-isotype or OVA-BDCA2-injected mice without adjuvant (upper rows), or in the presence of R848 (lower rows). Scatter plot depicts the mean fluorescent intensity (MFI) for individual markers in different groups. Each dot represents an individual animal with the mean indicated for each group (horizontal bars)  $\pm$  SEM. \*  $p < 0.05$ , \*\*  $p < 0.01$ , \*\*\*  $p < 0.001$ , as determined by one-way ANOVA with Tukey post-test. Results are representative of 2 individual experiments.
